# Supplementary material for: A dataset of 30-meter annual vegetation phenology indicators (1985–2015) in urban areas of the conterminous United States
Source: Copernicus journal article supplement (doi:10.5194/essd-2019-9), 2019-02-14
Supplement: Supplementary file 1 [file essd-2019-9-supplement.pdf]

**Title page:**

**Supplementary Information**

**A dataset of 30-meter annual vegetation phenology indicators (1985-2015) in urban areas of the conterminous United States**

Xuecao Li<sup>1</sup>, Yuyu Zhou<sup>\*1</sup>, Lin Meng<sup>1</sup>, Ghassem R. Asrar<sup>2</sup>, Chaoqun Lu<sup>3</sup>, Qiusheng Wu<sup>4</sup>

<sup>1</sup>Department of Geological and Atmospheric Sciences, Iowa State University, Ames, IA, 50011, USA

<sup>2</sup>Joint Global Change Research Institute, Pacific Northwest National Lab, College Park, MD, 20740, USA

<sup>3</sup>Department of Ecology, Evolution, and Organismal Biology, Iowa State University, Ames, IA, 50011, USA

<sup>4</sup>Department of Geography, Binghamton University, SUNY, Binghamton, NY, 13902, USA

\*Corresponding author:

Department of Geological and Atmospheric Sciences

Iowa State University

Ames, Iowa, 50011, USA

Phone: (515) 294-2842

Fax: (515) 294-6049

[yuyuzhou@iastate.edu](mailto:yuyuzhou@iastate.edu)

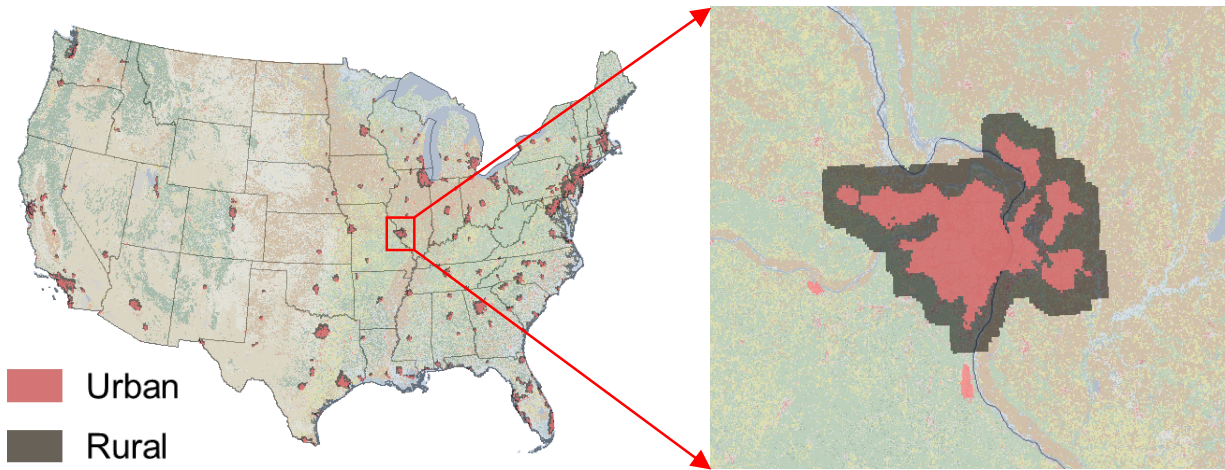

**Fig. S1.** Urban and surrounding rural areas in this study.

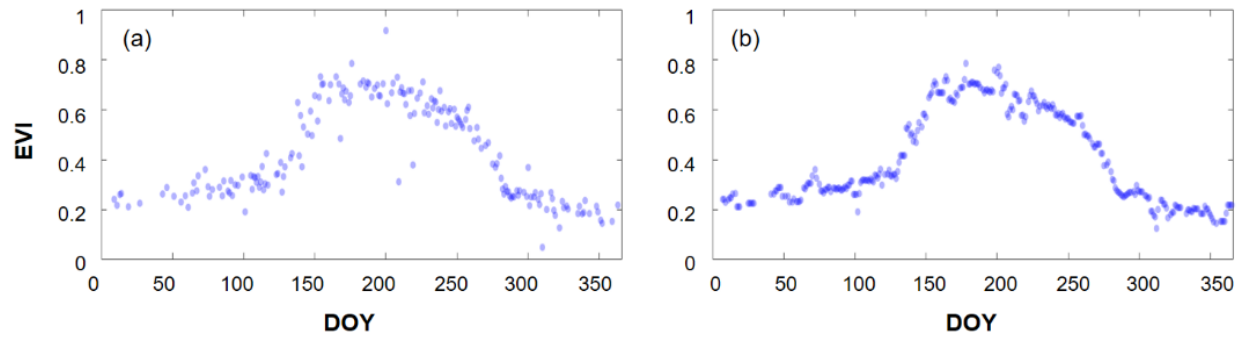

**Fig. S2.** Comparison of the raw (a) and smoothed (b) EVI time series for a specific site in a forest ecosystem from 1985 to 2015 (*Latitude: 41.16337397 N, Longitude: 77.93396473 W*).

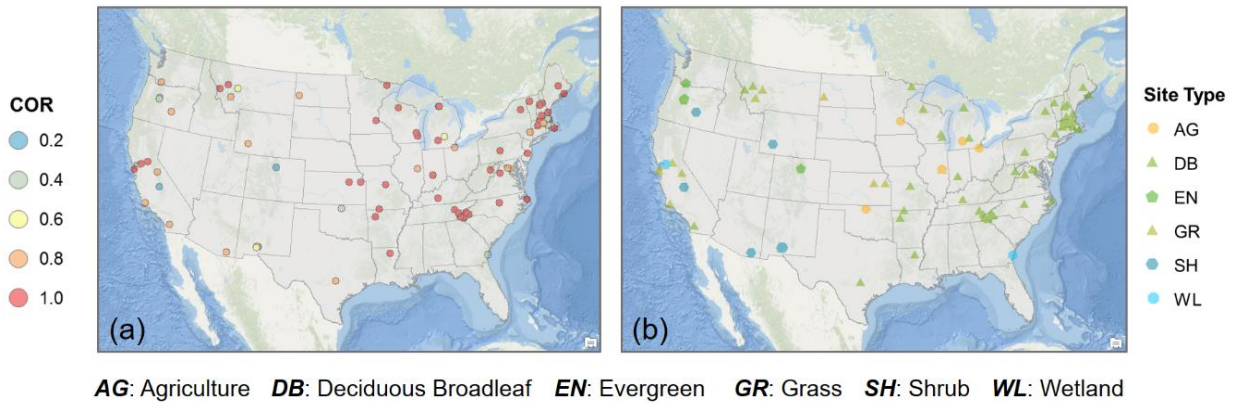

**Fig. S3.** The correlation coefficient (COR) of the raw and fitted EVIs using the fitting of the double logistic model (a) and land cover types (b) in PhenoCam stations. PhenoCam stations were derived from <https://phenocam.sr.unh.edu/webcam/network/map/>.
